# Supplementary material for: Dual-responsive nanoparticles based on oxidized pullulan and a disulfide-containing poly(β-amino) ester for efficient delivery of genes and chemotherapeutic agents targeting hepatoma
Source: Royal Society of Chemistry journal article supplement (doi:10.1039/c6py01664b), 2016-01-01
Supplement: c6py01664b1.pdf [file c6py01664b1.pdf]

## SUPPLEMENTARY INFORMATION

### Dual-responsive nanoparticles based on oxidized pullulan and disulfide-containing poly( $\beta$ -amino) ester for efficient delivery of gene and chemotherapy agent targeting to hepatoma

Hemei Wang,<sup>‡a</sup> Guoyun Wan,<sup>‡a</sup> Yuanyuan Liu,<sup>a,b</sup> Bowei Chen,<sup>a</sup> Hongli Chen,<sup>c</sup> Sipei Zhang,<sup>a</sup> Dan Wang,<sup>a</sup> Qingqing Xiong,<sup>b</sup> Ning Zhang<sup>\*ab</sup> and Yinsong Wang<sup>\*a</sup>

<sup>a</sup> School of Pharmacy, Tianjin Key Laboratory on Technologies Enabling Development of Clinical Therapeutics and Diagnostics (Theranostics) & Research Center of Basic Medical Science, Tianjin Medical University, Tianjin 300070, China

<sup>b</sup> Tianjin Medical University Cancer Institute and Hospital, National Clinical Research Center for Cancer, Key Laboratory of Cancer Prevention and Therapy, Tianjin 300060, China

<sup>c</sup> Research Center of Stem Cell and Biotherapy Technology, School of Life Science and Technology, Xinxiang Medical University, Xinxiang Henan 453003, China

**Table S1** Characteristic parameters of oxPLs

| Samples  | MW <sup>a</sup> | PDI <sup>a</sup> | Oxidation degree <sup>b</sup> (%) |
|----------|-----------------|------------------|-----------------------------------|
| Pullulan | 162808          | 2.571            | 0                                 |
| oxPL-1   | 42785           | 1.386            | 17.58±1.30                        |
| oxPL-2   | 29952           | 1.264            | 40.12±0.23                        |
| oxPL-3   | 23228           | 1.305            | 64.13±0.46                        |

<sup>a</sup> The molecular weight (MW) relative to standard polyethylene glycol and polydispersity index (PDI) were determined by gel permeation chromatography (GPC) with a CoMetre 6000 LDI pump, a Scham-beck SFD GmbH RI2000 refractive index detector, and Shodex SB-802.5 & -804 HQ columns. The mobile phase consisted of 0.3 M NaH<sub>2</sub>PO<sub>4</sub> and 1.0 M acetic acid at a flow rate of 0.5 mL min<sup>-1</sup>.

<sup>b</sup> The oxidation degrees of oxPLs were calculated from aldehyde contents determined by the hydroxyl amine hydrochloride/potentiometric titration according to the following formula.

$$\text{Oxidation degree \%} = \frac{C_{\text{NaOH}} \times \Delta V \times 161}{2 \times W_{\text{oxPL}}}$$

Where  $C_{\text{NaOH}}$  was the concentration of NaOH,  $\Delta V$  was the volume of NaOH consumed, and  $W_{\text{oxPL}}$  was the weight of oxPL.

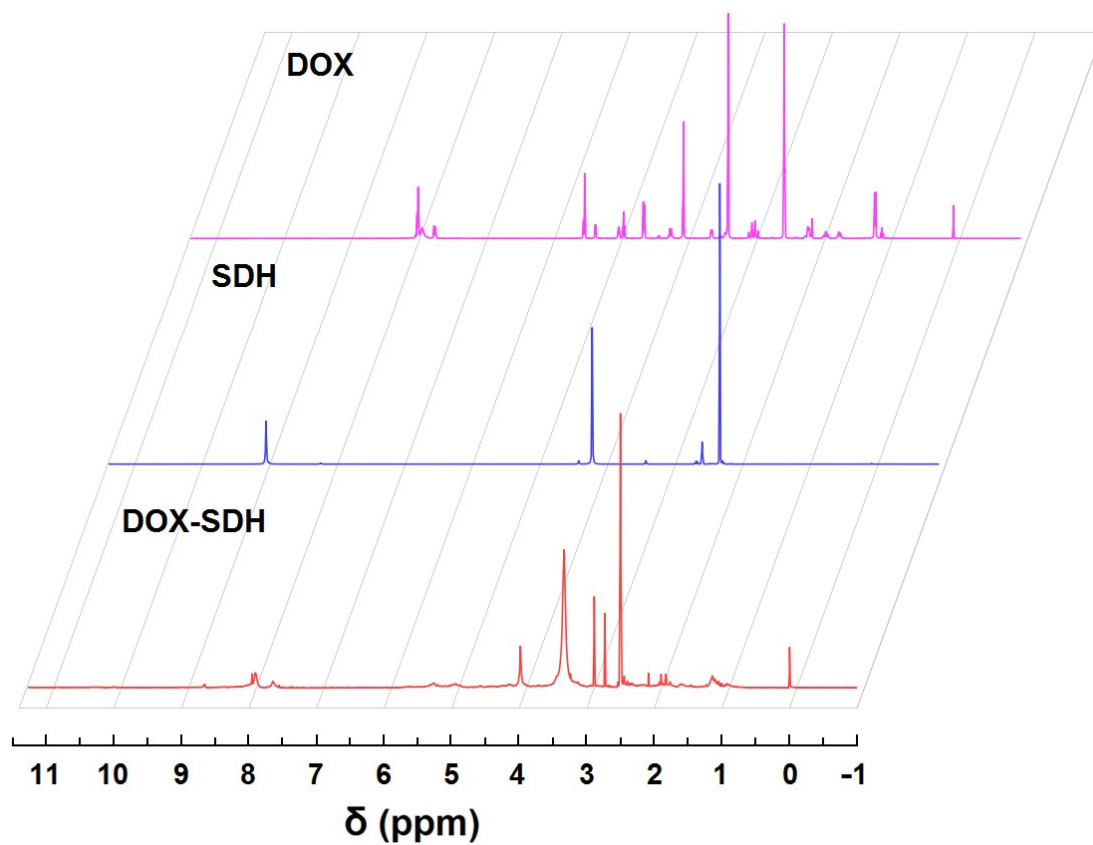

**Fig. S1** The <sup>1</sup>H NMR spectra of doxorubicin (DOX), succinic dihydrazide (SDH) and DOX-SDH conjugate.

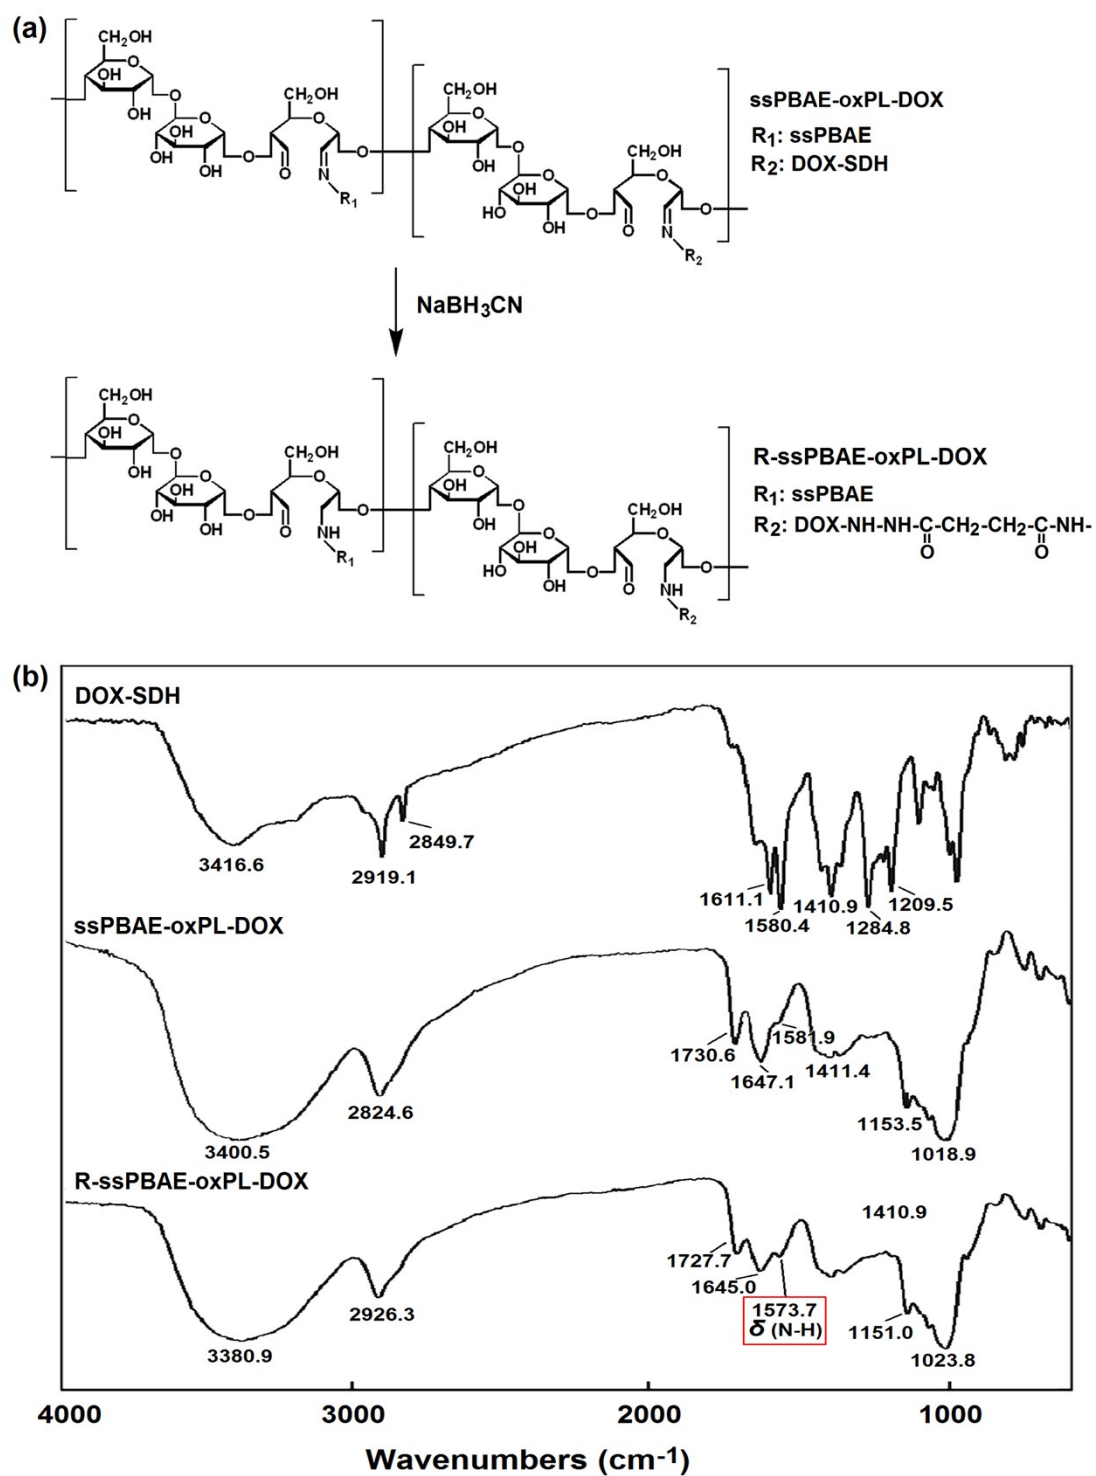

**Fig. S2** The synthesis of R-ssPBAE-oxPL-DOX (a) and the IR spectra of DOX-SDH, ssPBAE-oxPL-DOX and R-ssPBAE-oxPL-DOX (b).

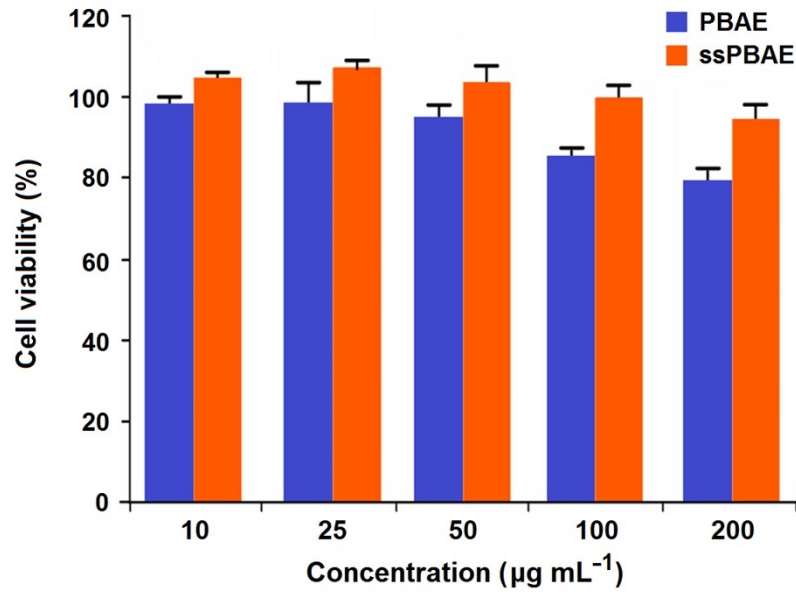

**Fig. S3** The viabilities of HepG2 cells treated with poly( $\beta$ -amino) ester (PBAE) and disulfide-containing poly( $\beta$ -amino) ester (ssPBAE) for 48 h.

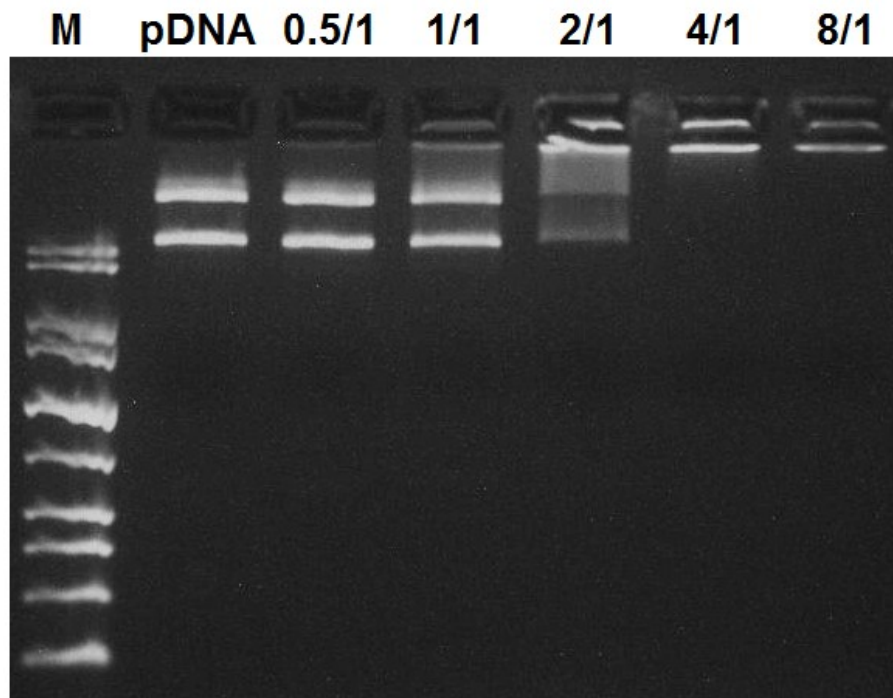

**Fig. S4** The electrophoretic mobility shift assay of branched polyethylenimine (PEI)/pDNA polycomplexes at different N/P ratios. The molecular mass of PEI was 25 kDa.

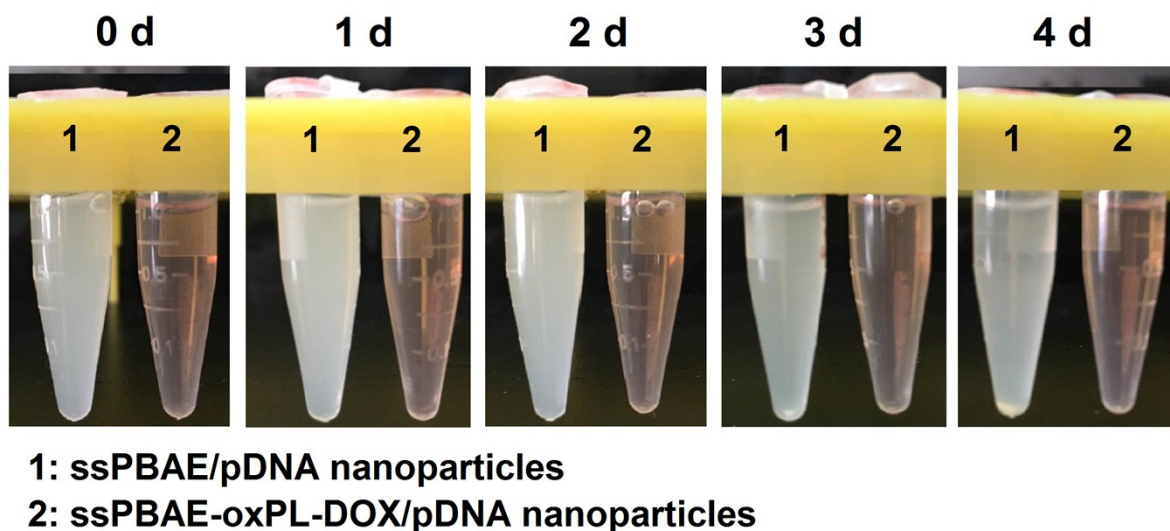

**Fig. S5** The photos of ssPBAE/pDNA and ssPBAE-oxPL-DOX/pDNA nanoparticles with the N/P ratios respectively of 9/1 and 12/1 in 10% calf serum during a 4-day storage period.

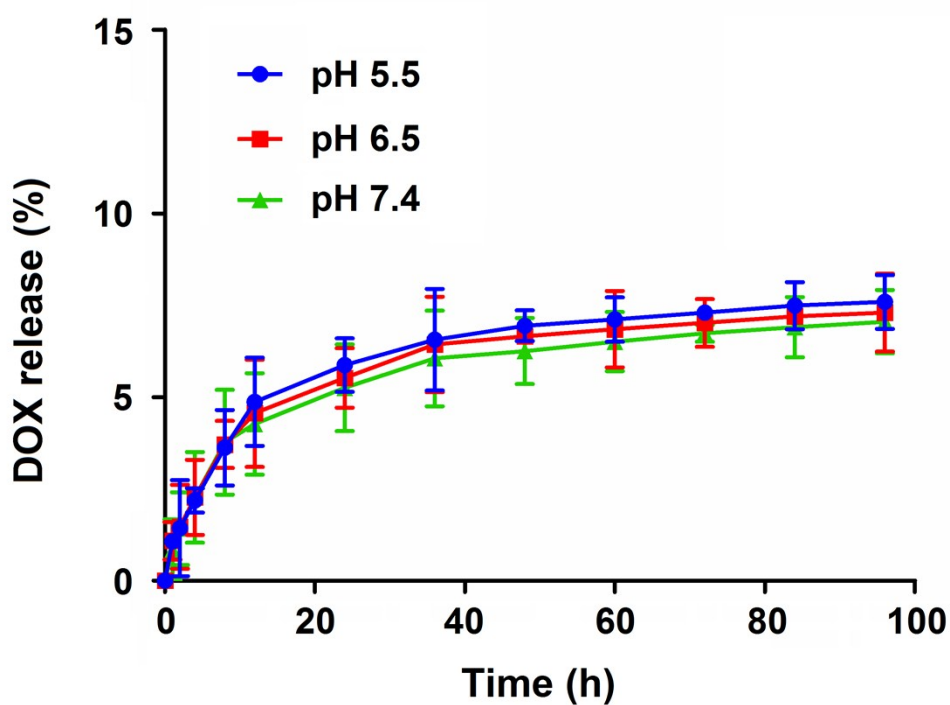

**Fig. S6** The release profiles of DOX from R-ssPBAE-oxPL-DOX/pDNA nanoparticles with the N/P ratio of 12/1 in phosphate buffer salines (pH 5.5, 6.5 and 7.4).

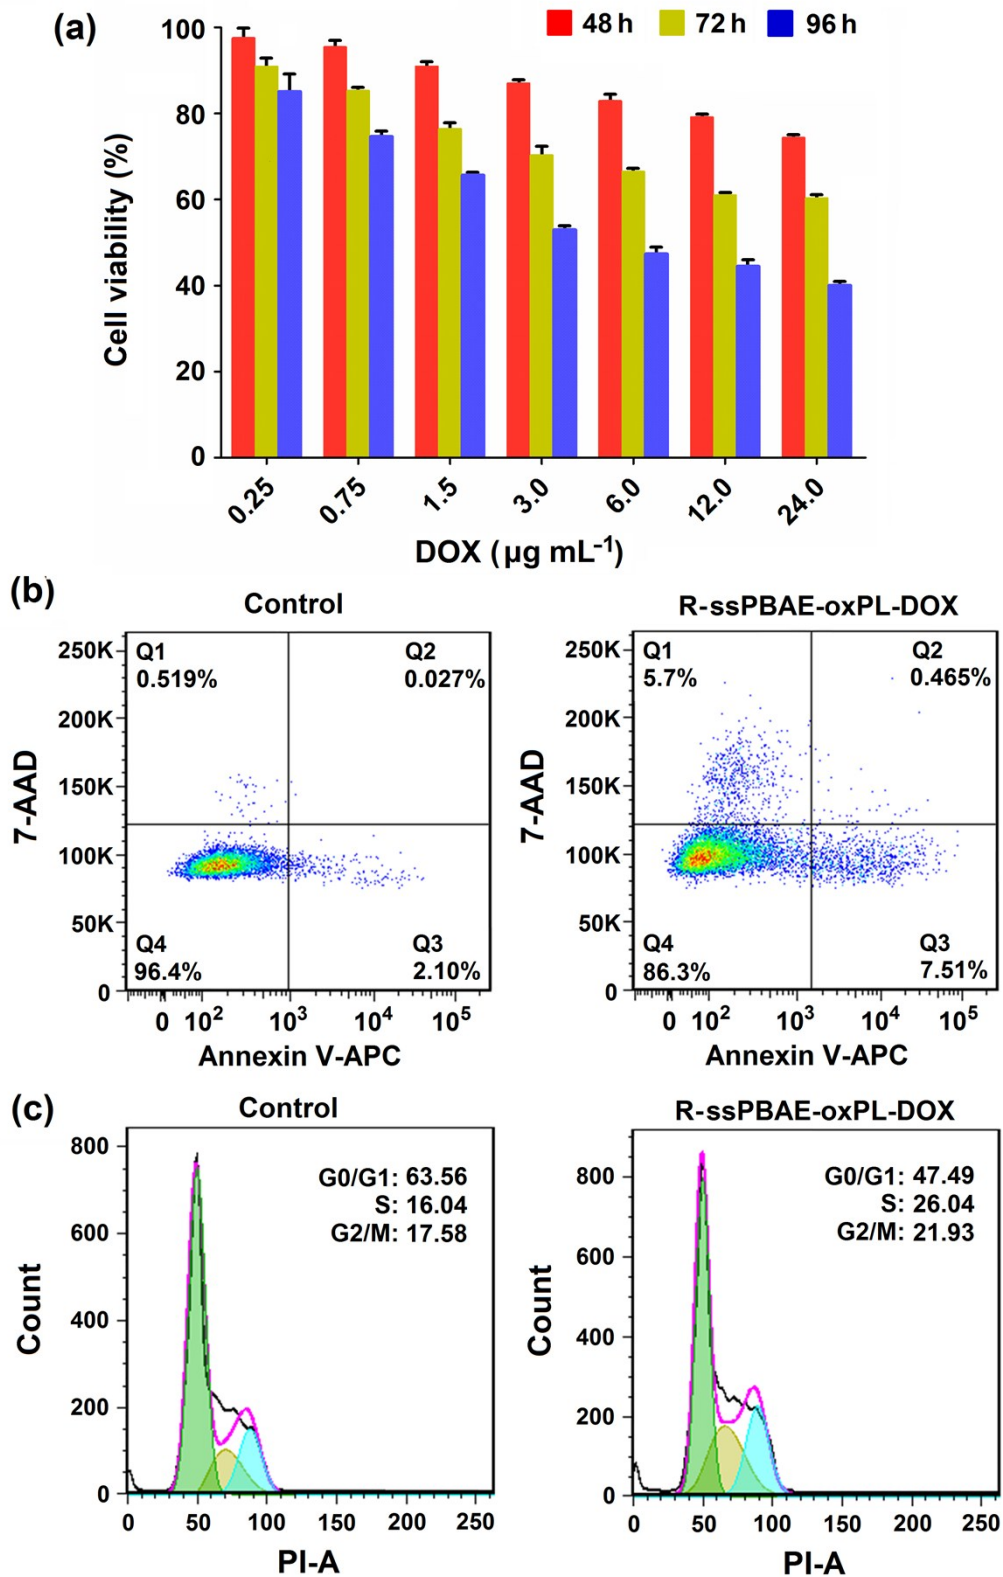

**Fig. S7** The viability (a), apoptosis (b) and cell cycle distribution (c) of HepG2 cells treated with R-ssPBAE-oxPL-DOX/pDNA nanoparticles. Q1: dead cells; Q2: late apoptotic cells; Q3: early apoptotic cells; Q4: live cells. To detect the cell apoptosis and cell cycle distribution, HepG2 cells were incubated with nanoparticles at DOX concentration of 2  $\mu\text{g}$

$\text{mL}^{-1}$  for 72 h.
